# Supplementary material for: Triterpenoid acids isolated from Schinus terebinthifolia fruits reduce Staphylococcus aureus virulence and abate dermonecrosis
Source: PubMed Central journal article supplement (PMC7229044; doi:10.1038/s41598-020-65080-3), 2020-05-15

## SUPPORTING INFORMATION

### Triterpenoid acids isolated from *Schinus terebinthifolia* fruits reduce *Staphylococcus aureus* virulence and abate dermonecrosis

Huaqiao Tang<sup>1,2†</sup>, Gina Porras<sup>1†</sup>, Morgan M. Brown<sup>3</sup>, Francois Chassagne<sup>1</sup>, James T. Lyles<sup>1</sup>, John Bacsa<sup>4</sup>, Alexander R. Horswill<sup>3</sup>, Cassandra L. Quave<sup>1,5\*</sup>

<sup>1</sup>Center for the Study of Human Health, Emory University, 550 Asbury Circle, Candler Library 107E, Atlanta, Georgia, USA.

<sup>2</sup>Department of Pharmacy, Sichuan Agricultural University, Chengdu, Sichuan, China.

<sup>3</sup>Department of Immunology and Microbiology, University of Colorado School of Medicine, Aurora, CO 80045

<sup>4</sup>X-ray Crystallography Center, Emory University, 1515 Dickey Dr., Atlanta, GA 30322, USA.

<sup>5</sup>Department of Dermatology, Emory University School of Medicine, 615 Michael St., Rm 105L Whitehead Bldg, Atlanta, GA, USA.

† Co-first authors.

## INDEX

|                                                                                                      |    |
|------------------------------------------------------------------------------------------------------|----|
| <b>Figure S1.</b> Fractionation strategy, with percent yields of the active fractions and compounds. | 2  |
| <b>Figure S2.</b> <sup>1</sup> H NMR spectrum of compound 1.                                         | 3  |
| <b>Figure S3.</b> <sup>1</sup> H NMR spectrum of compound 2.                                         | 4  |
| <b>Figure S4.</b> <sup>1</sup> H NMR spectrum of compound 3.                                         | 5  |
| <b>Figure S5.</b> HRMS-APCI spectra of compounds 1-3.                                                | 6  |
| <b>Figure S6.</b> HRMS-APCI spectra of compounds 1-3.                                                | 7  |
| <b>Figure S7.</b> HRMS-APCI spectra of compounds 1-3.                                                | 8  |
| <b>Figure S8.</b> Quorum quenching activity step 4: fractions.                                       | 9  |
| <b>Figure S9.</b> Quorum quenching activity step 5, 430F-F5-PF11: fractions and compounds.           | 10 |
| <b>Figure S10.</b> Quorum quenching activity step 5, 430F-F5-PF12: fractions and compounds.          | 11 |
| <b>Table S1.</b> Profile of bacterial strains used in this study.                                    | 12 |
| <b>Data Set 1.</b> CheckCIF/PLATON report on compound 1.                                             | 13 |
| <b>Data Set 2.</b> CheckCIF/PLATON report on compound 2.                                             | 17 |
| <b>Data Set 3.</b> CheckCIF/PLATON report on compound 3.                                             | 21 |

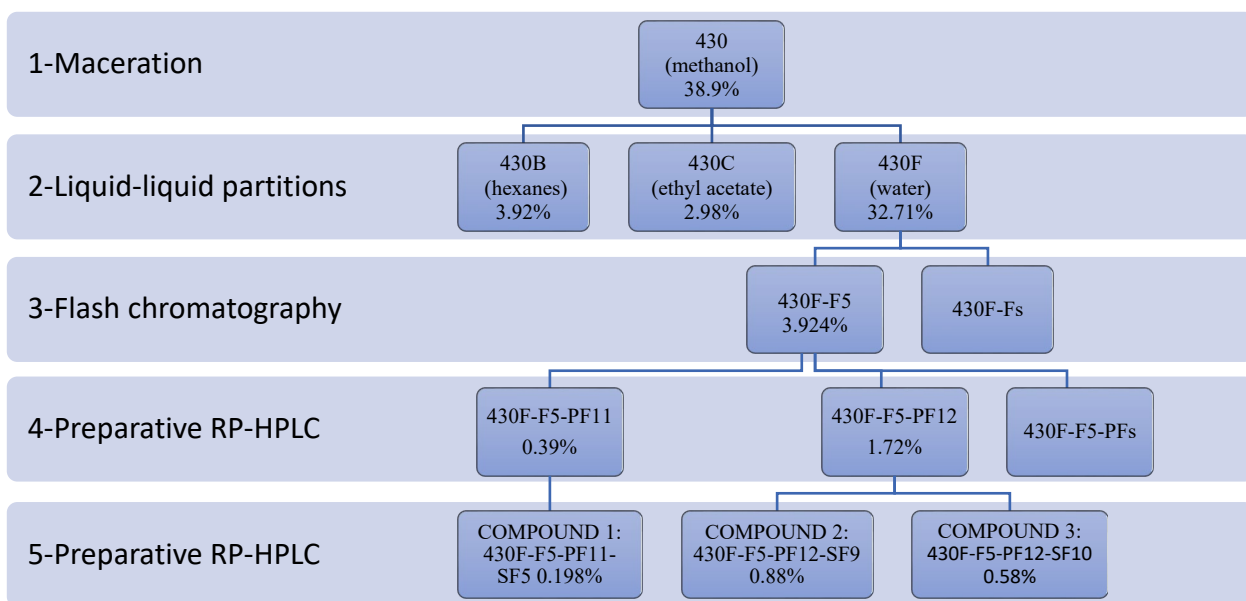

**Figure S1.** Fractionation strategy, with percent yields of the active fractions and compounds.

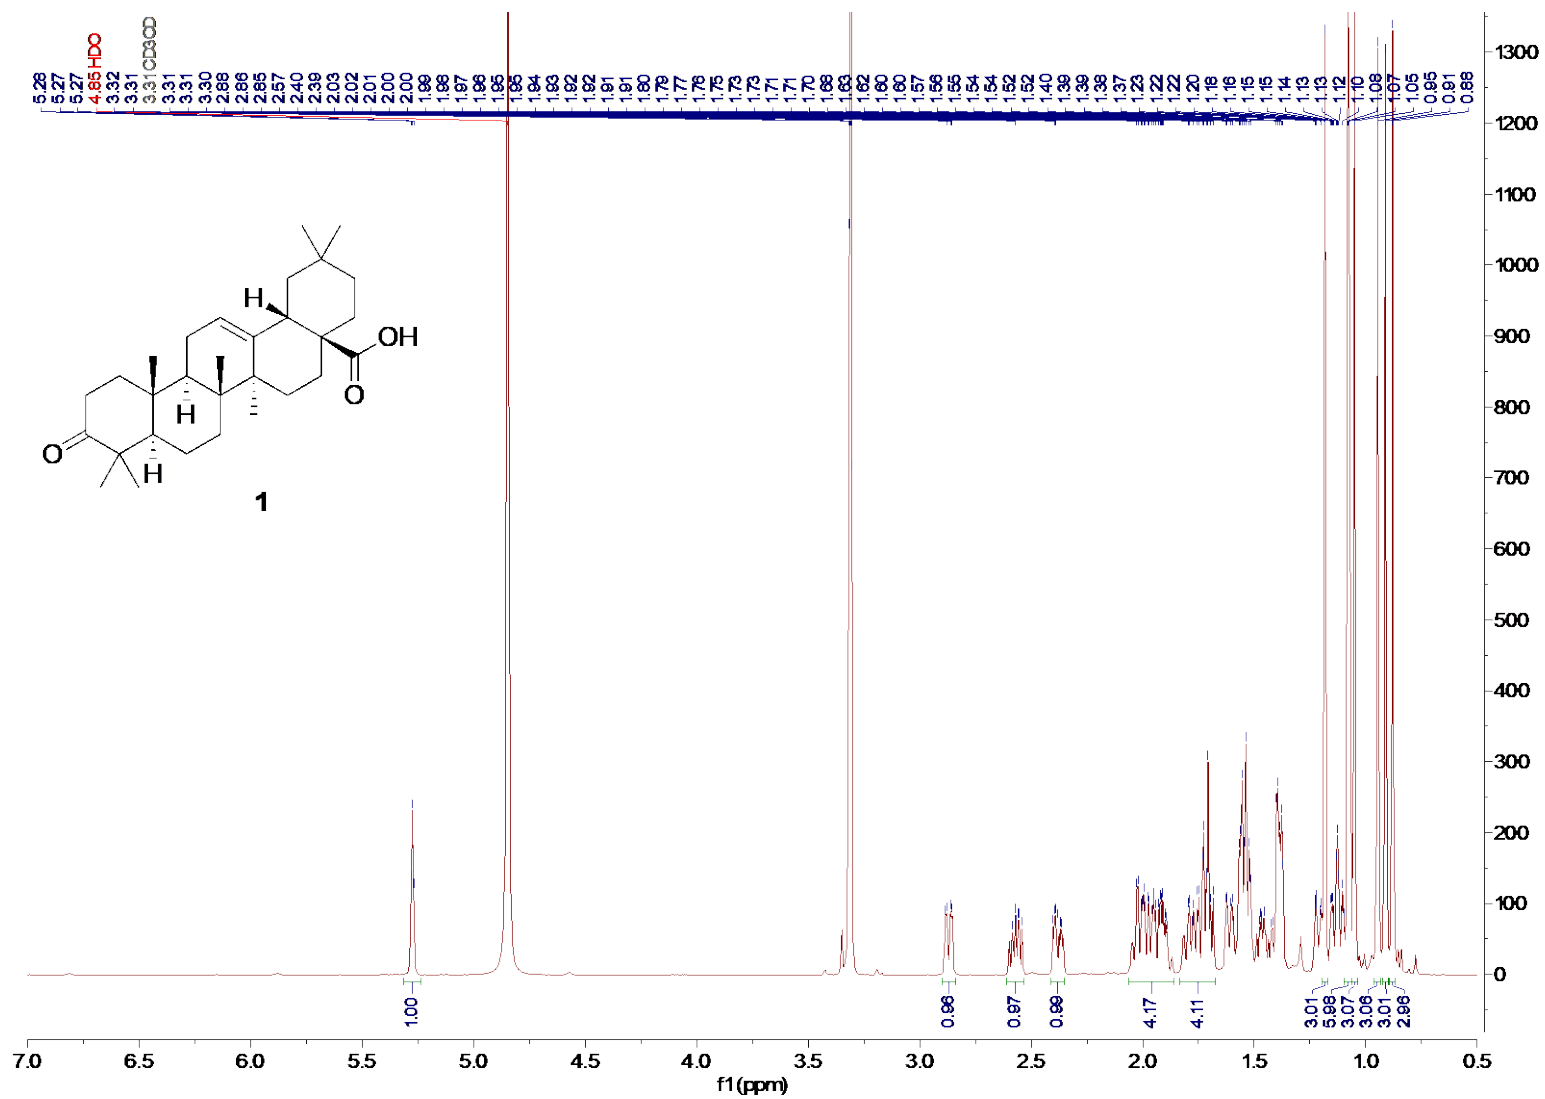

Figure S2. <sup>1</sup>H NMR (600 MHz, CD<sub>3</sub>OD) spectrum of compound **1**.

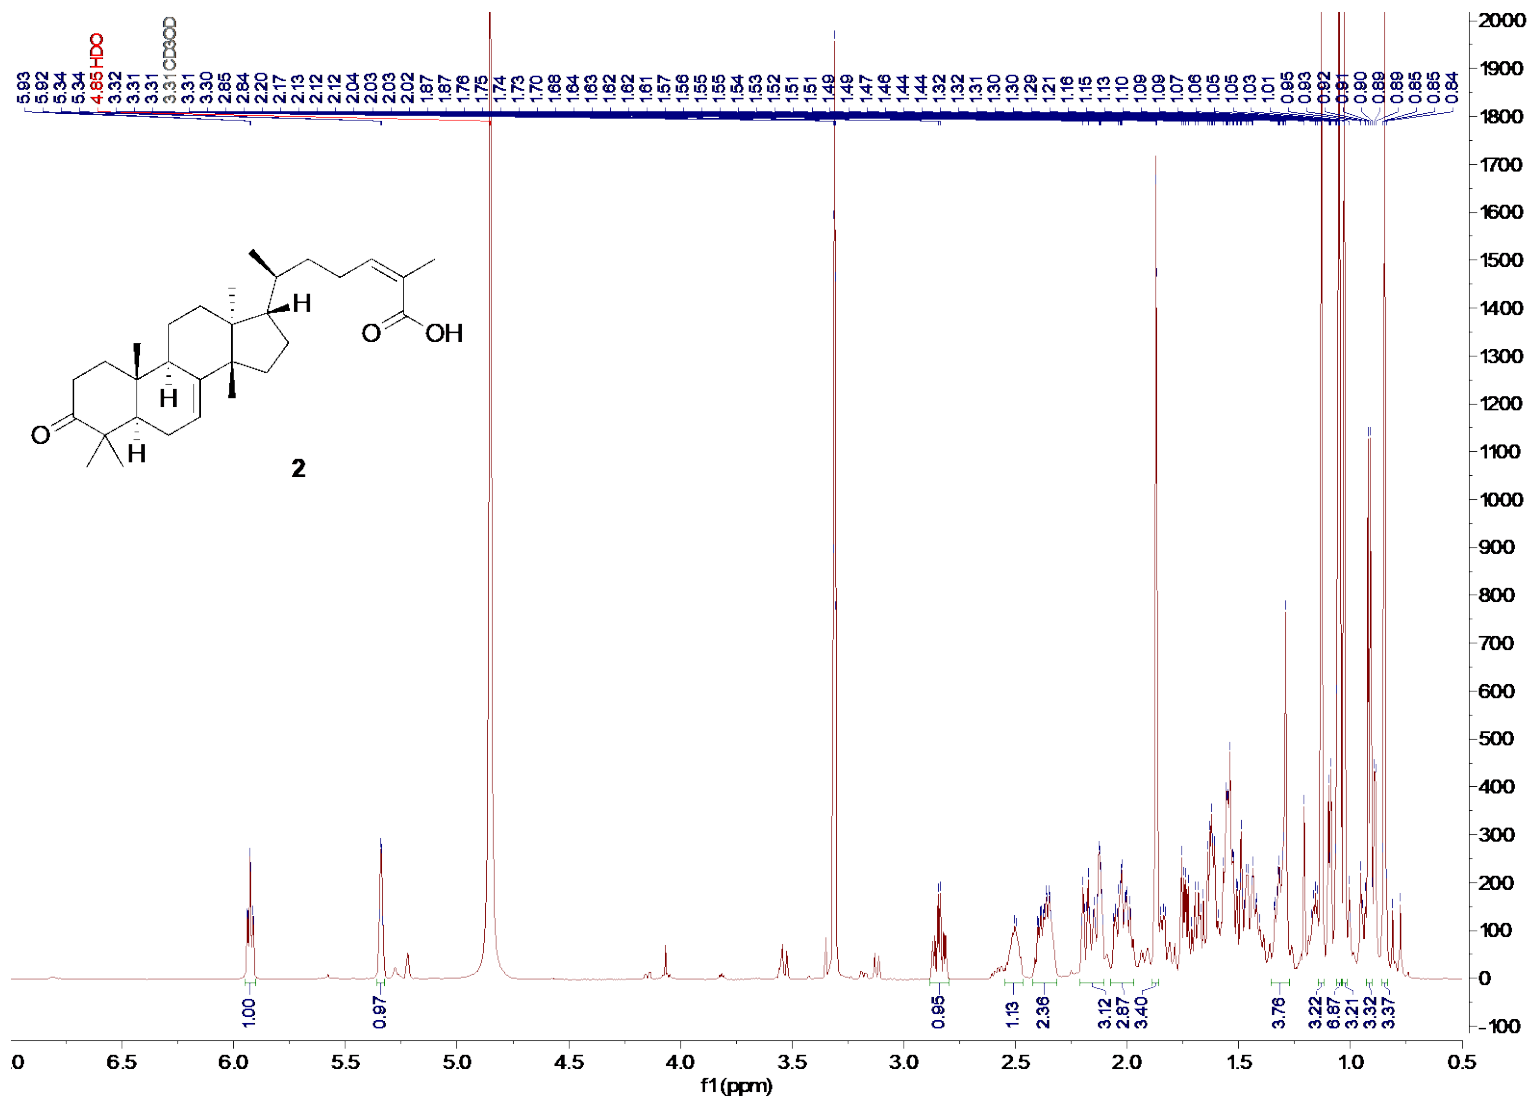

Figure S3. <sup>1</sup>H NMR (600 MHz, CD<sub>3</sub>OD) spectrum of compound 2.

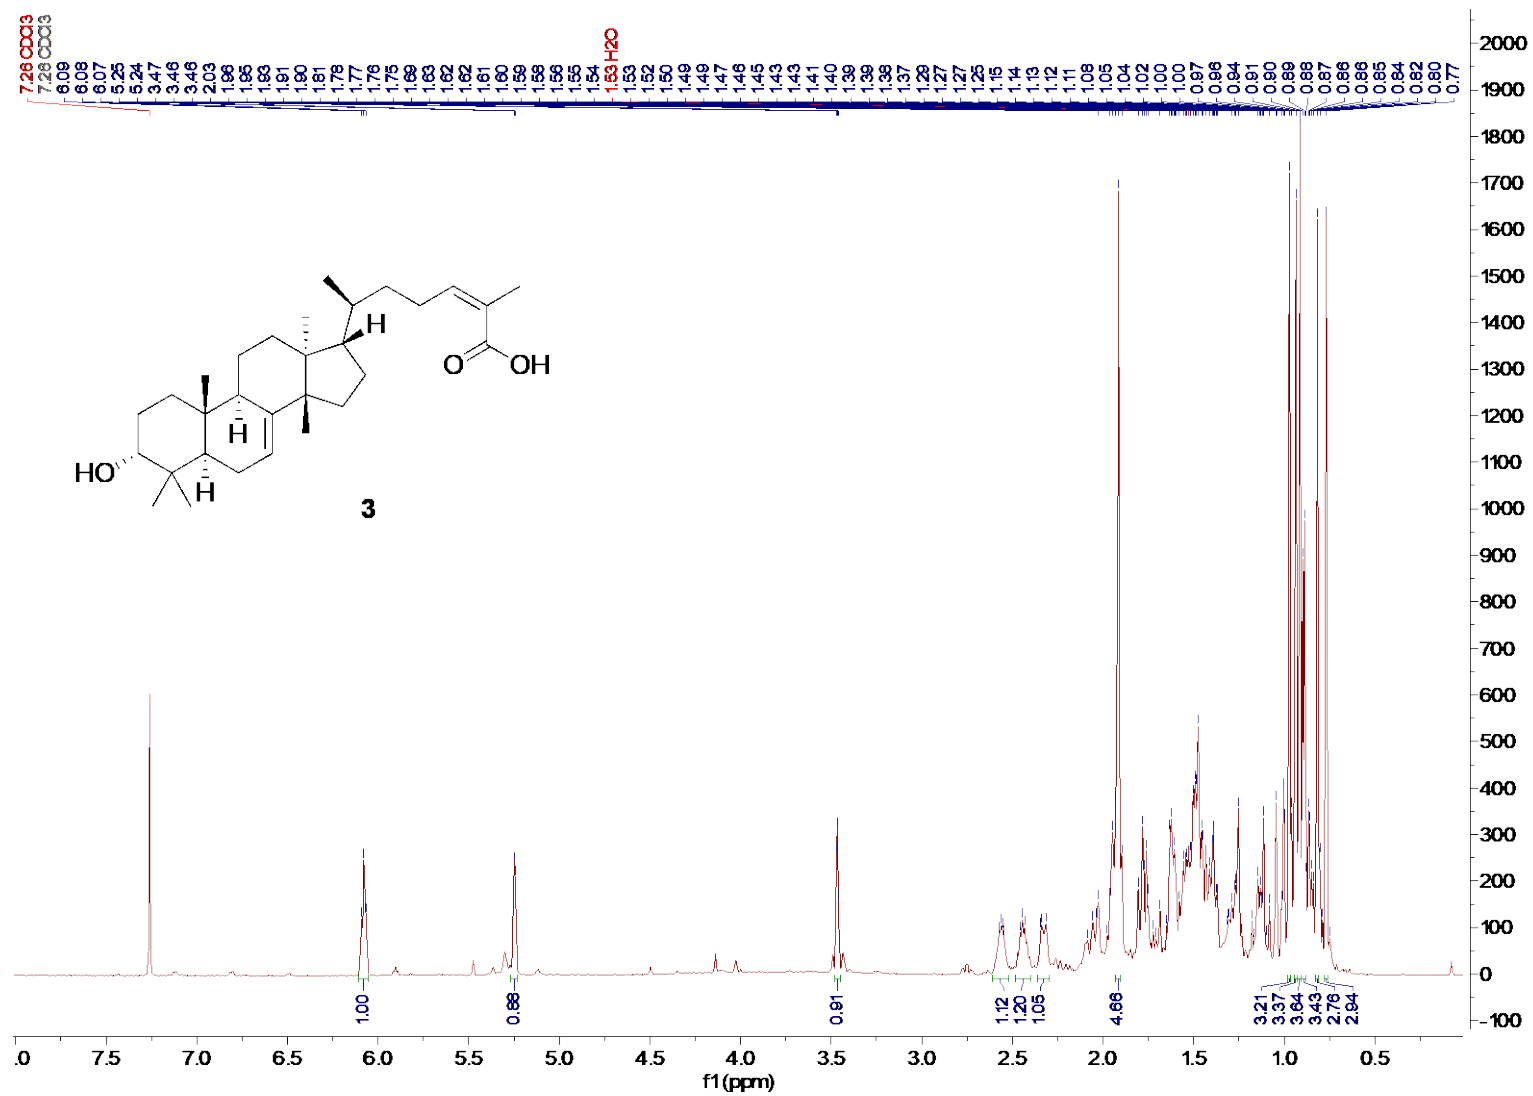

Figure S4. <sup>1</sup>H NMR (600 MHz, CDCl<sub>3</sub>) spectrum of compound 3.

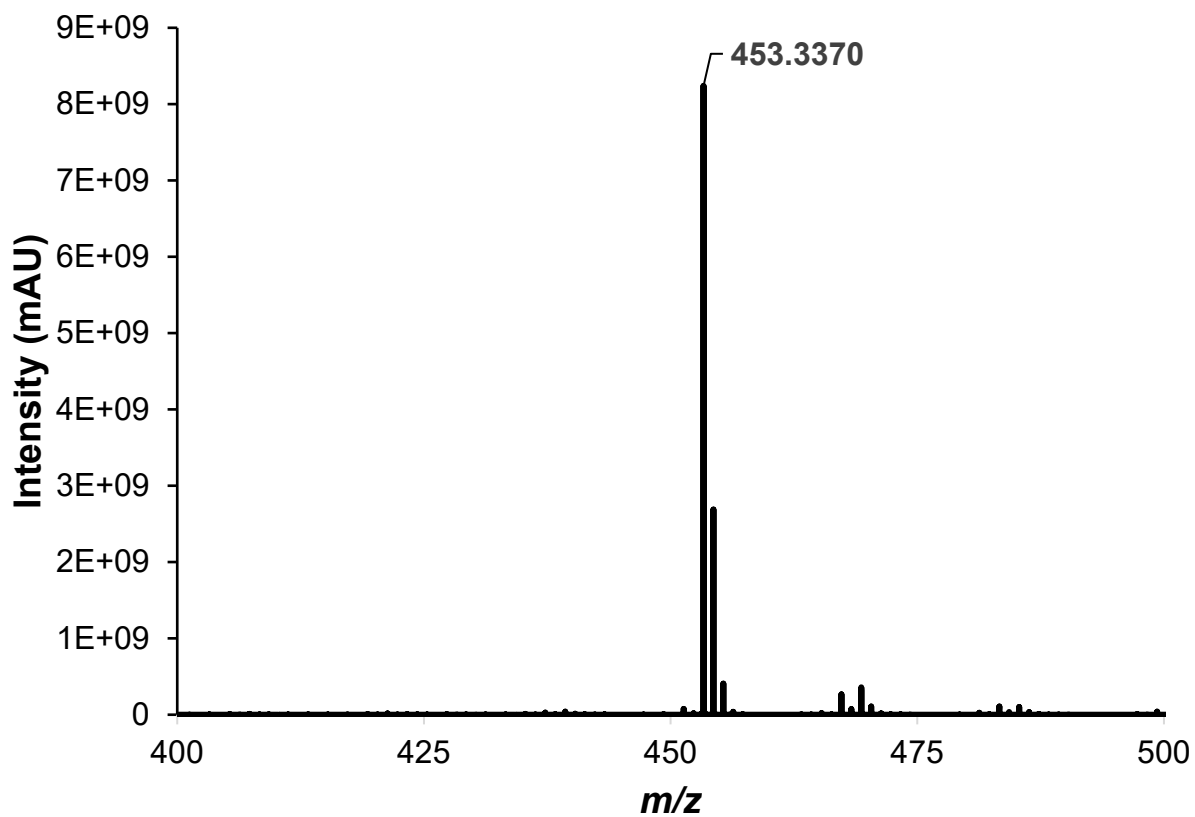

| Peak Mass | Display Formula                                | RDB | Delta [ppm] | Theoretical mass | Combined Score | MS Cov. [%] |
|-----------|------------------------------------------------|-----|-------------|------------------|----------------|-------------|
| 453.33696 | C <sub>30</sub> H <sub>45</sub> O <sub>3</sub> | 8.5 | -1.01       | 453.33742        | 96.53          | 99.31       |

**Figure S5.** HRMS-APCI negative mode spectra and empirical formula calculations for compound **1**.

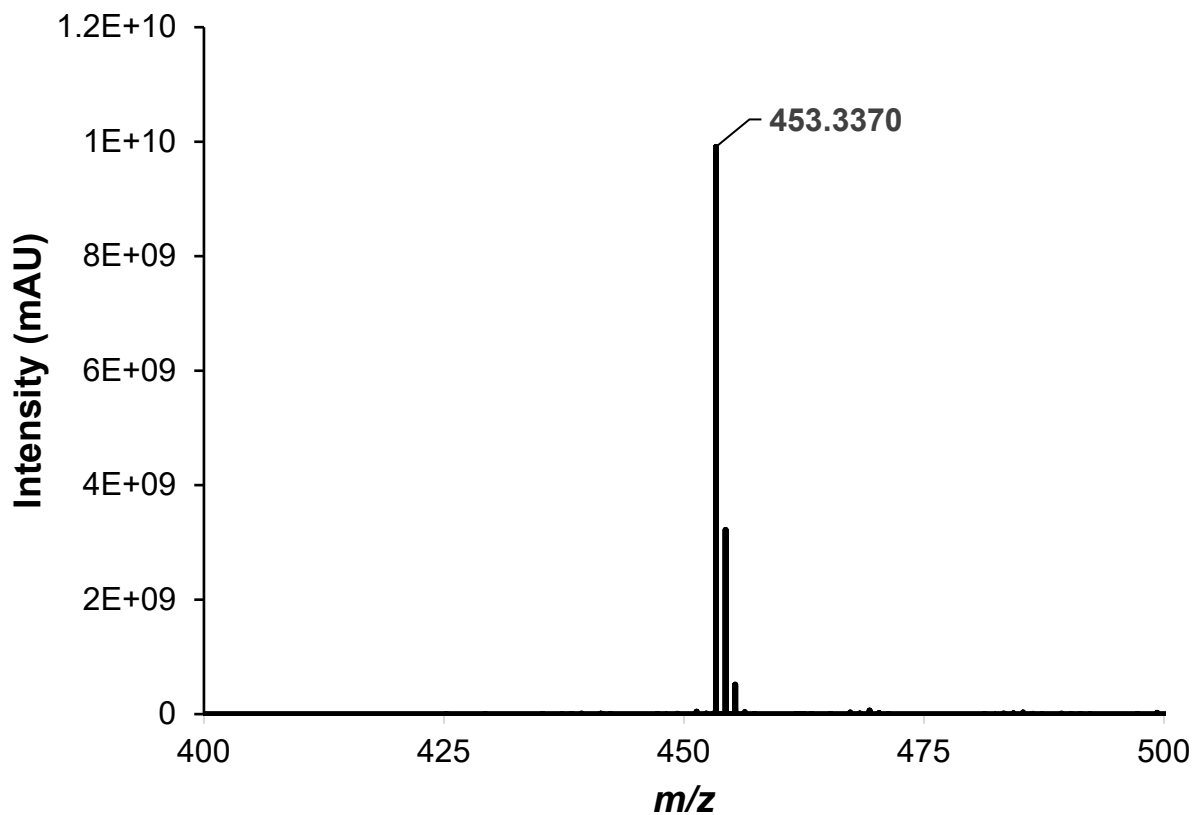

| Peak Mass | Display Formula   | RDB | Delta [ppm] | Theoretical. mass | Combined Score | MS Cov. [%] |
|-----------|-------------------|-----|-------------|-------------------|----------------|-------------|
| 453.33687 | $C_{30}H_{45}O_3$ | 8.5 | -1.2        | 453.33742         | 96.43          | 99.24       |

**Figure S6.** HRMS-APCI negative mode spectra and empirical formula calculations for compound 2.

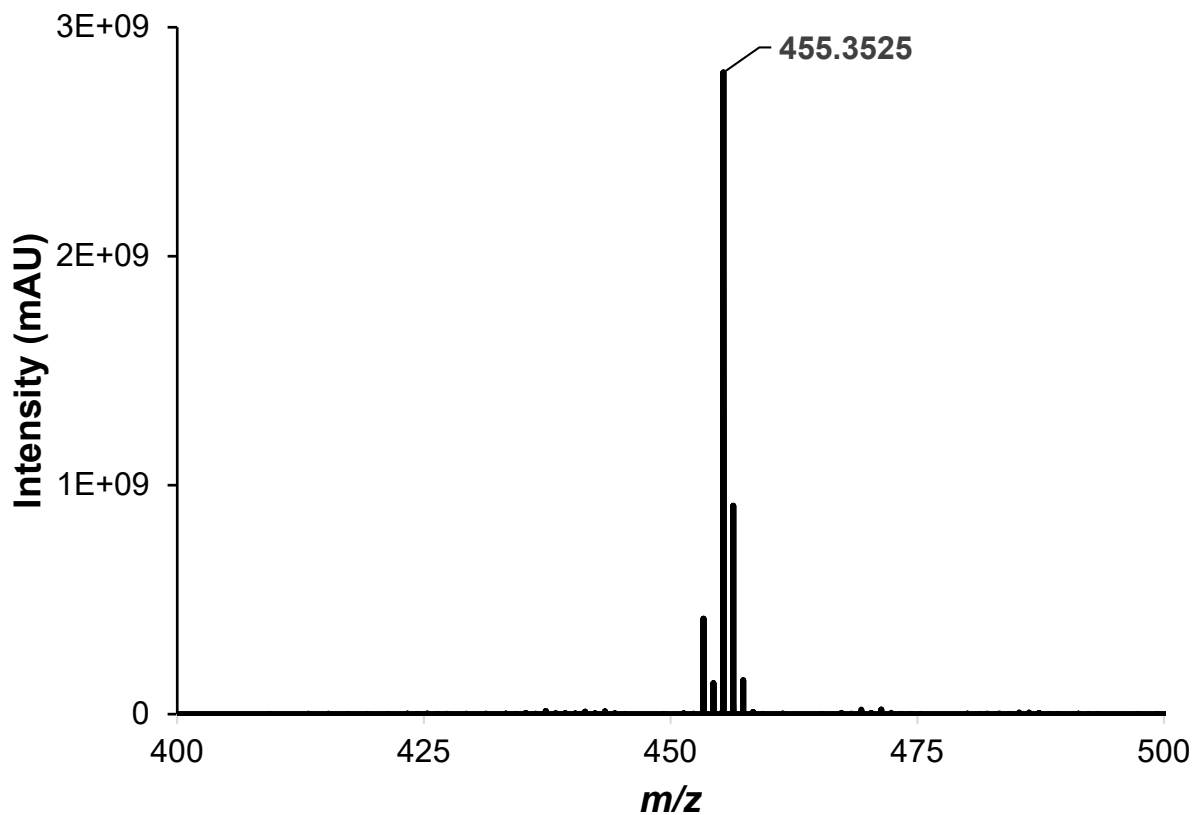

| Peak Mass | Display Formula                                | RDB | Delta [ppm] | Theoretical. mass | Combined Score | MS Cov. [%] |
|-----------|------------------------------------------------|-----|-------------|-------------------|----------------|-------------|
| 455.35251 | C <sub>30</sub> H <sub>47</sub> O <sub>3</sub> | 7.5 | -1.22       | 455.35307         | 95.93          | 98.79       |

**Figure S7.** HRMS-APCI negative mode spectra and empirical formula calculations for compound **3**.



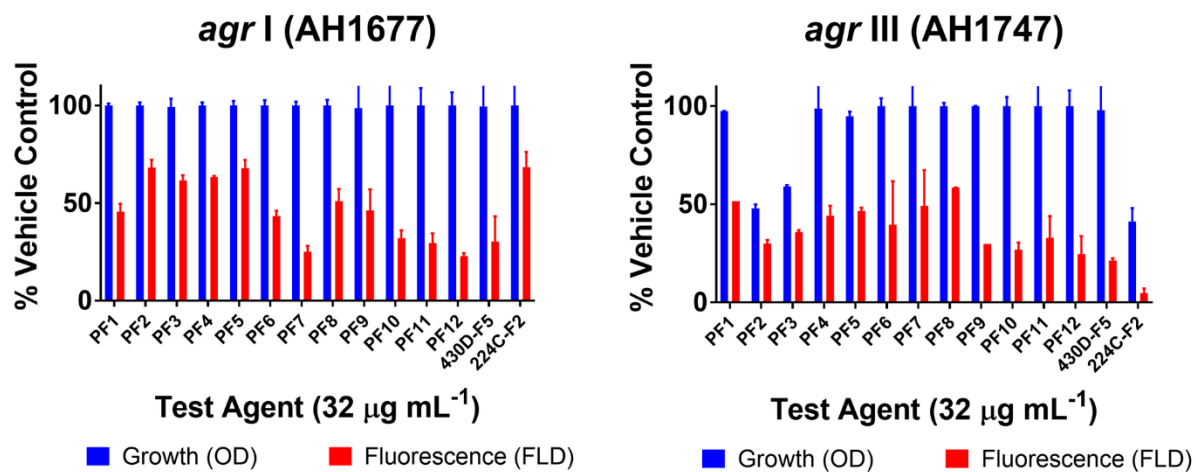

**Figure S8.** Quorum quenching activity step 4 (fractionation strategy, see **Figure S1**): fractions.

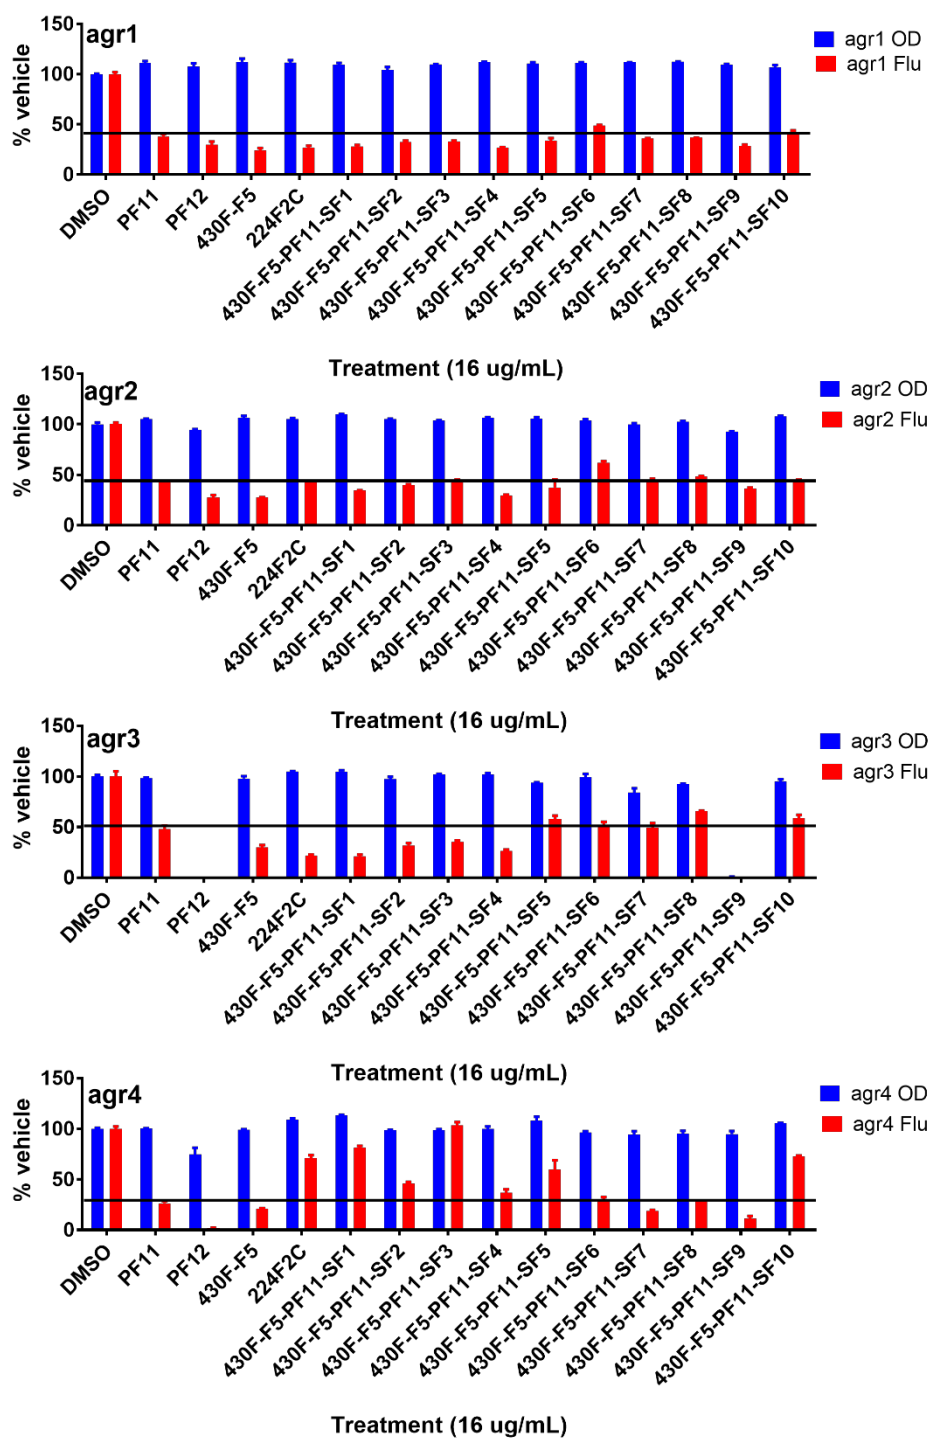

**Figure S9.** Quorum quenching activity step 5, 430F-F5-PF11 (fractionation strategy, see **Figure S1**): fractions and compounds.

\*Note: Compound 1: 430F-F5-PF11-SF5. 224F2c was used as a control.

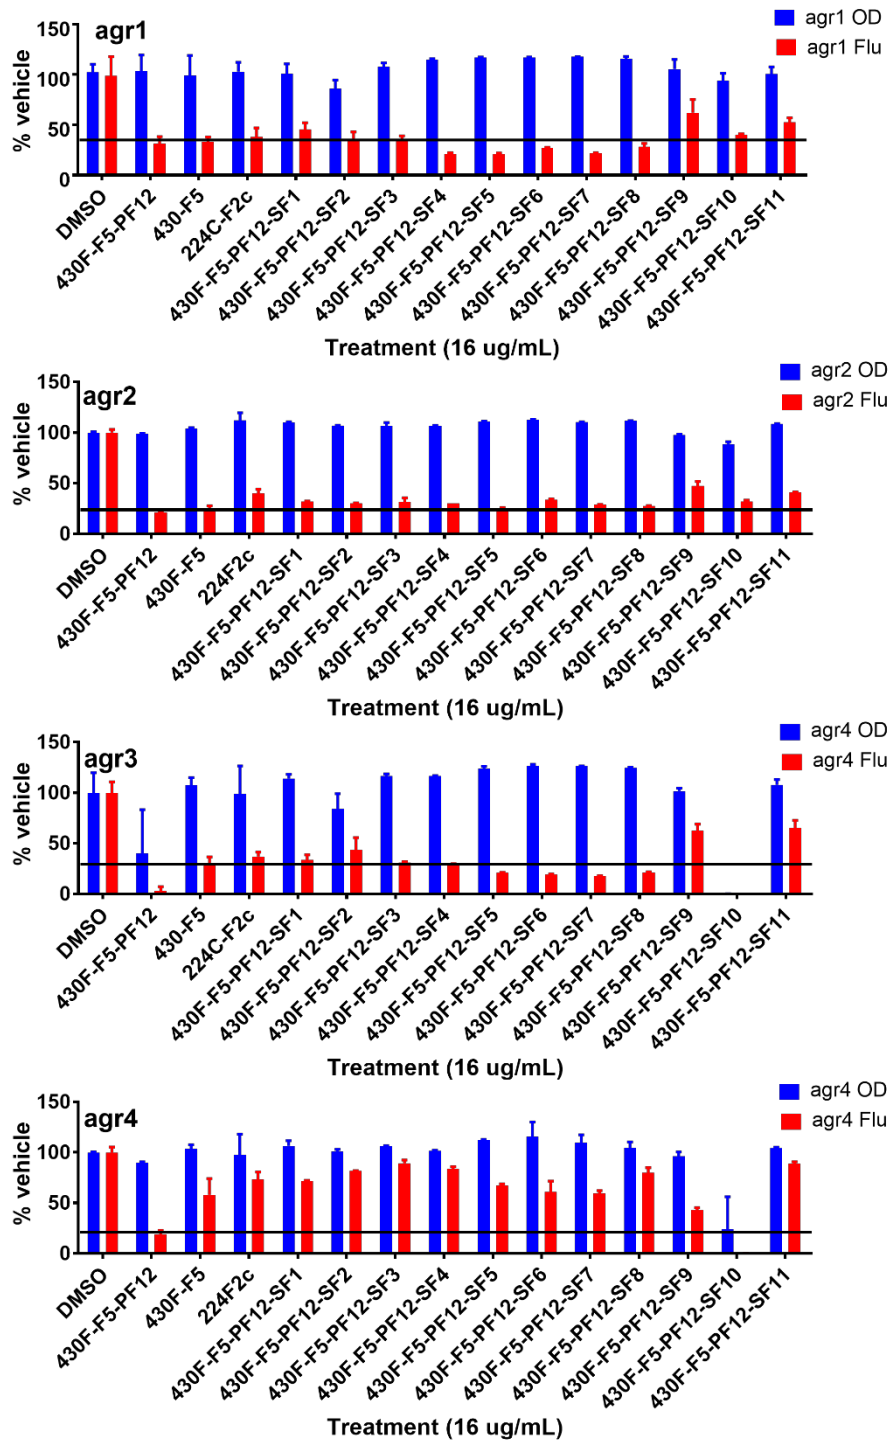

**Figure S10.** Quorum quenching activity step 5, 430F-F5-PF12 (fractionation strategy, see **Figure S1**): fractions and compounds.

\*Note: Compound **2**: 430F-F5-PF12-SF9; Compound **3**: 430F-F5-PF12-SF10. 224F2c was used as a control.

| Strain ID    | Other Characteristics                                                                                           |
|--------------|-----------------------------------------------------------------------------------------------------------------|
| AH430        | SA502a + pDB59 Cm <sup>R</sup> , yfp reporter, <i>agr</i> type II                                               |
| AH1263 (LAC) | CA-MRSA, PFT USA300, <i>agr</i> type I                                                                          |
| AH1677       | AH845 + pDB59 Cm <sup>R</sup> , yfp reporter, <i>agr</i> type I                                                 |
| AH1747       | MW2 + pDB59 Cm <sup>R</sup> , yfp reporter, <i>agr</i> type III                                                 |
| AH1872       | MN EV(407) + pDB59 Cm <sup>R</sup> , yfp reporter, <i>agr</i> type IV                                           |
| NRS249       | sea+, (lukE-lukD)+, hlgv+, associated with native valve endocarditis; SCCmec type IV, <i>agr</i> type I         |
| UAMS-1       | MSSA, osteomyelitis isolate, strong biofilm producer                                                            |
| UAMS-929     | Isogenic <i>sarA</i> mutant of UAMS-1, biofilm deficient control strain                                         |
| AH5116       | Plasmid: pHC147. Genotype: pCM29- <i>PlukA</i> , Cm <sup>R</sup> . Reference: Crosby <i>et al.</i> (2019)       |
| AH5382       | Plasmid: pHC178. Genotype: pCM29- <i>PgehB</i> , Cm <sup>R</sup> . Reference: Crosby <i>et al.</i> (2019)       |
| AH3613       | Plasmid: pHC68. Genotype: <i>mgrA</i> P2-sGFP fusion, Erm <sup>R</sup> . Reference: Crosby <i>et al.</i> (2016) |
| AH5101       | Plasmid: pCM38. Genotype: <i>Pnuc-sGFP</i> , Cm <sup>R</sup> . Reference: Yan <i>et al.</i> (2019)              |
| AH5095       | Plasmid: pHC144. Genotype: pCM29- <i>PesxA</i> , Cm <sup>R</sup> . Reference: Crosby <i>et al.</i> (2019)       |

**Table S1.** Profile of *Staphylococcus aureus* strains used in this study.

#### References:

Crosby, H.A., Schlievert, P.M., Merriman, J.A., King, J.M., Salgado-Pabon, W. and Horswill, A.R. (2016). The *Staphylococcus aureus* global regulator MgrA modulates clumping and virulence by controlling surface protein expression. *PLoS Pathogens*, 12, e1005604.

Crosby, H.A., Tiwari, N., Kwiecinski, J.M., Xu, Z., Dykstra, A., Jenul, C., Fuentes, E.J., and Horswill, A.R. (2019). The *Staphylococcus aureus* ArlRS two-component system regulates virulence factor expression through MgrA. *Molecular Microbiology*. Available at: doi:10.1111/mmi.14404

Yan, H., Wang, Q., Teng, M. and Li, X. (2019) The DNA- binding mechanism of the TCS response regulator ArlR from *Staphylococcus aureus*. *Journal of Structural Biology*. Available at: doi:10.1016/j.jsb.2019.09.005.

# checkCIF/PLATON report

Structure factors have been supplied for datablock(s) pf11-sf5

THIS REPORT IS FOR GUIDANCE ONLY. IF USED AS PART OF A REVIEW PROCEDURE FOR PUBLICATION, IT SHOULD NOT REPLACE THE EXPERTISE OF AN EXPERIENCED CRYSTALLOGRAPHIC REFEREE.

No syntax errors found.      CIF dictionary      Interpreting this report

## Datablock: pf11-sf5

---

|                 |                                                  |                                            |
|-----------------|--------------------------------------------------|--------------------------------------------|
| Bond precision: | C-C = 0.0037 A                                   | Wavelength=1.54184                         |
| Cell:           | a=11.8169(3)      b=7.3667(2)      c=34.0413(12) | alpha=90      beta=95.459(3)      gamma=90 |
| Temperature:    | 106 K                                            |                                            |
|                 | Calculated                                       | Reported                                   |
| Volume          | 2949.91(15)                                      | 2949.88(16)                                |
| Space group     | I 2                                              | I 1 2 1                                    |
| Hall group      | I 2y                                             | I 2y                                       |
| Moiety formula  | C30 H46 O3, 2(C H4 O)                            | 2(C H4 O), C30 H46 O3                      |
| Sum formula     | C32 H54 O5                                       | C32 H54 O5                                 |
| Mr              | 518.75                                           | 518.75                                     |
| Dx,g cm-3       | 1.168                                            | 1.168                                      |
| Z               | 4                                                | 4                                          |
| Mu (mm-1)       | 0.601                                            | 0.601                                      |
| F000            | 1144.0                                           | 1144.0                                     |
| F000'           | 1147.18                                          |                                            |
| h,k,lmax        | 14,8,40                                          | 14,8,40                                    |
| Nref            | 5400[ 2928]                                      | 5239                                       |
| Tmin,Tmax       | 0.918,0.952                                      | 0.659,1.000                                |
| Tmin'           | 0.817                                            |                                            |

Correction method= # Reported T Limits: Tmin=0.659 Tmax=1.000  
AbsCorr = GAUSSIAN

Data completeness= 1.79/0.97      Theta(max)= 68.217

R(reflections)= 0.0410( 4942)      wR2(reflections)= 0.1133( 5239)

S = 1.057      Npar= 356

---

The following ALERTS were generated. Each ALERT has the format

**test-name\_ALERT\_alert-type\_alert-level.**

Click on the hyperlinks for more details of the test.

---

● **Alert level C**

PLAT412\_ALERT\_2\_C Short Intra XH3 .. XHn H3A ..H23A . 1.87 Ang.  
x,y,z = 1\_555 Check  
PLAT911\_ALERT\_3\_C Missing FCF Refl Between Thmin & STh/L= 0.600 21 Report

---

● **Alert level G**

PLAT002\_ALERT\_2\_G Number of Distance or Angle Restraints on AtSite 6 Note  
PLAT042\_ALERT\_1\_G Calc. and Reported MoietyFormula Strings Differ Please Check  
PLAT172\_ALERT\_4\_G The CIF-Embedded .res File Contains DFIX Records 3 Report  
PLAT720\_ALERT\_4\_G Number of Unusual/Non-Standard Labels ..... 6 Note  
PLAT791\_ALERT\_4\_G Model has Chirality at C1 (Sohnke SpGr) R Verify  
PLAT791\_ALERT\_4\_G Model has Chirality at C2 (Sohnke SpGr) S Verify  
PLAT791\_ALERT\_4\_G Model has Chirality at C5 (Sohnke SpGr) S Verify  
PLAT791\_ALERT\_4\_G Model has Chirality at C6 (Sohnke SpGr) S Verify  
PLAT791\_ALERT\_4\_G Model has Chirality at C11 (Sohnke SpGr) R Verify  
PLAT791\_ALERT\_4\_G Model has Chirality at C12 (Sohnke SpGr) R Verify  
PLAT791\_ALERT\_4\_G Model has Chirality at C13 (Sohnke SpGr) R Verify  
PLAT860\_ALERT\_3\_G Number of Least-Squares Restraints ..... 4 Note  
PLAT912\_ALERT\_4\_G Missing # of FCF Reflections Above STh/L= 0.600 9 Note  
PLAT933\_ALERT\_2\_G Number of OMIT Records in Embedded .res File ... 7 Note  
PLAT941\_ALERT\_3\_G Average HKL Measurement Multiplicity ..... 4.9 Low  
PLAT978\_ALERT\_2\_G Number C-C Bonds with Positive Residual Density. 8 Info

---

0 **ALERT level A** = Most likely a serious problem - resolve or explain  
0 **ALERT level B** = A potentially serious problem, consider carefully  
2 **ALERT level C** = Check. Ensure it is not caused by an omission or oversight  
16 **ALERT level G** = General information/check it is not something unexpected

1 ALERT type 1 CIF construction/syntax error, inconsistent or missing data  
4 ALERT type 2 Indicator that the structure model may be wrong or deficient  
3 ALERT type 3 Indicator that the structure quality may be low  
10 ALERT type 4 Improvement, methodology, query or suggestion  
0 ALERT type 5 Informative message, check

---

---

It is advisable to attempt to resolve as many as possible of the alerts in all categories. Often the minor alerts point to easily fixed oversights, errors and omissions in your CIF or refinement strategy, so attention to these fine details can be worthwhile. In order to resolve some of the more serious problems it may be necessary to carry out additional measurements or structure refinements. However, the purpose of your study may justify the reported deviations and the more serious of these should normally be commented upon in the discussion or experimental section of a paper or in the "special\_details" fields of the CIF. checkCIF was carefully designed to identify outliers and unusual parameters, but every test has its limitations and alerts that are not important in a particular case may appear. Conversely, the absence of alerts does not guarantee there are no aspects of the results needing attention. It is up to the individual to critically assess their own results and, if necessary, seek expert advice.

### **Publication of your CIF in IUCr journals**

A basic structural check has been run on your CIF. These basic checks will be run on all CIFs submitted for publication in IUCr journals (*Acta Crystallographica*, *Journal of Applied Crystallography*, *Journal of Synchrotron Radiation*); however, if you intend to submit to *Acta Crystallographica Section C* or *E* or *IUCrData*, you should make sure that full publication checks are run on the final version of your CIF prior to submission.

### **Publication of your CIF in other journals**

Please refer to the *Notes for Authors* of the relevant journal for any special instructions relating to CIF submission.

---

**PLATON version of 16/04/2020; check.def file version of 09/03/2020**

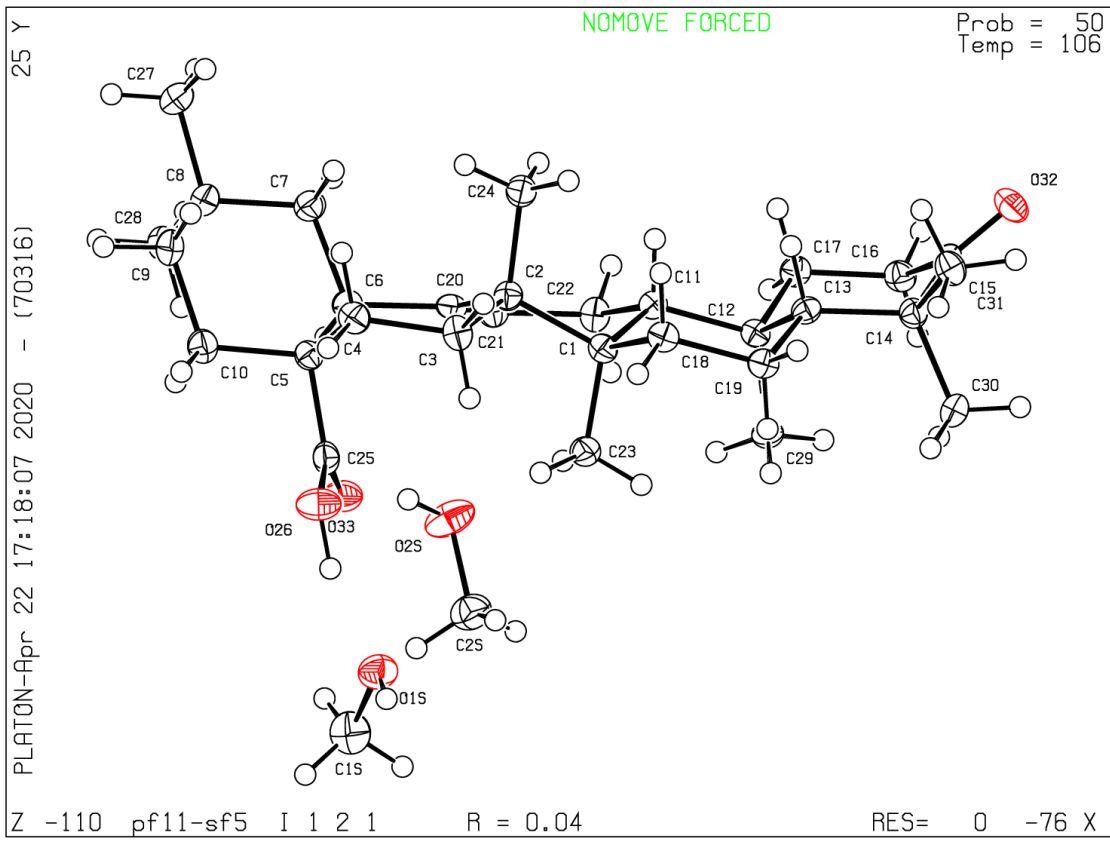



# checkCIF/PLATON report

Structure factors have been supplied for datablock(s) pf12-sf9

THIS REPORT IS FOR GUIDANCE ONLY. IF USED AS PART OF A REVIEW PROCEDURE FOR PUBLICATION, IT SHOULD NOT REPLACE THE EXPERTISE OF AN EXPERIENCED CRYSTALLOGRAPHIC REFEREE.

No syntax errors found.      CIF dictionary      Interpreting this report

## Datablock: pf12-sf9

---

|                 |                                                   |                    |
|-----------------|---------------------------------------------------|--------------------|
| Bond precision: | C-C = 0.0029 A                                    | Wavelength=1.54184 |
| Cell:           | a=6.81969(10)      b=19.7846(3)      c=19.4400(3) |                    |
|                 | alpha=90      beta=94.4735(13)      gamma=90      |                    |
| Temperature:    | 107 K                                             |                    |
|                 | Calculated                                        | Reported           |
| Volume          | 2614.95(7)                                        | 2614.95(7)         |
| Space group     | P 21                                              | P 1 21 1           |
| Hall group      | P 2yb                                             | P 2yb              |
| Moiety formula  | C30 H46 O3                                        | 4(C30 H46 O3)      |
| Sum formula     | C30 H46 O3                                        | C120 H184 O12      |
| Mr              | 454.67                                            | 1818.66            |
| Dx,g cm-3       | 1.155                                             | 1.155              |
| Z               | 4                                                 | 1                  |
| Mu (mm-1)       | 0.557                                             | 0.557              |
| F000            | 1000.0                                            | 1000.0             |
| F000'           | 1002.65                                           |                    |
| h,k,lmax        | 8,24,24                                           | 8,24,24            |
| Nref            | 11027[ 5679]                                      | 10230              |
| Tmin,Tmax       | 0.902,0.933                                       | 0.491,1.000        |
| Tmin'           | 0.762                                             |                    |

Correction method= # Reported T Limits: Tmin=0.491 Tmax=1.000  
AbsCorr = GAUSSIAN

Data completeness= 1.80/0.93      Theta(max)= 76.669

R(reflections)= 0.0349( 9980)      wR2(reflections)= 0.0938( 10230)

S = 1.022      Npar= 610

---

The following ALERTS were generated. Each ALERT has the format

**test-name\_ALERT\_alert-type\_alert-level.**

Click on the hyperlinks for more details of the test.

---

● **Alert level C**

PLAT911\_ALERT\_3\_C Missing FCF Refl Between Thmin & STh/L= 0.600 7 Report  
PLAT915\_ALERT\_3\_C No Flack x Check Done: Low Friedel Pair Coverage 88 %

---

● **Alert level G**

PLAT007\_ALERT\_5\_G Number of Unrefined Donor-H Atoms ..... 2 Report  
PLAT042\_ALERT\_1\_G Calc. and Reported MoietyFormula Strings Differ Please Check  
PLAT045\_ALERT\_1\_G Calculated and Reported Z Differ by a Factor ... 4.00 Check  
PLAT380\_ALERT\_4\_G Incorrectly? Oriented X(sp<sup>2</sup>)-Methyl Moiety ..... C25B Check  
PLAT720\_ALERT\_4\_G Number of Unusual/Non-Standard Labels ..... 9 Note  
PLAT791\_ALERT\_4\_G Model has Chirality at C1 (Sohnke SpGr) S Verify  
PLAT791\_ALERT\_4\_G Model has Chirality at C1B (Sohnke SpGr) S Verify  
PLAT791\_ALERT\_4\_G Model has Chirality at C2 (Sohnke SpGr) S Verify  
PLAT791\_ALERT\_4\_G Model has Chirality at C2B (Sohnke SpGr) S Verify  
PLAT791\_ALERT\_4\_G Model has Chirality at C5 (Sohnke SpGr) S Verify  
PLAT791\_ALERT\_4\_G Model has Chirality at C5B (Sohnke SpGr) S Verify  
PLAT791\_ALERT\_4\_G Model has Chirality at C8 (Sohnke SpGr) S Verify  
PLAT791\_ALERT\_4\_G Model has Chirality at C8B (Sohnke SpGr) S Verify  
PLAT791\_ALERT\_4\_G Model has Chirality at C9 (Sohnke SpGr) R Verify  
PLAT791\_ALERT\_4\_G Model has Chirality at C9B (Sohnke SpGr) R Verify  
PLAT791\_ALERT\_4\_G Model has Chirality at C10 (Sohnke SpGr) R Verify  
PLAT791\_ALERT\_4\_G Model has Chirality at C10B (Sohnke SpGr) R Verify  
PLAT791\_ALERT\_4\_G Model has Chirality at C20 (Sohnke SpGr) S Verify  
PLAT791\_ALERT\_4\_G Model has Chirality at C20B (Sohnke SpGr) S Verify  
PLAT910\_ALERT\_3\_G Missing # of FCF Reflection(s) Below Theta(Min). 1 Note  
PLAT912\_ALERT\_4\_G Missing # of FCF Reflections Above STh/L= 0.600 171 Note  
PLAT933\_ALERT\_2\_G Number of OMIT Records in Embedded .res File ... 11 Note  
PLAT978\_ALERT\_2\_G Number C-C Bonds with Positive Residual Density. 21 Info

---

0 **ALERT level A** = Most likely a serious problem - resolve or explain

0 **ALERT level B** = A potentially serious problem, consider carefully

2 **ALERT level C** = Check. Ensure it is not caused by an omission or oversight

23 **ALERT level G** = General information/check it is not something unexpected

2 ALERT type 1 CIF construction/syntax error, inconsistent or missing data

2 ALERT type 2 Indicator that the structure model may be wrong or deficient

3 ALERT type 3 Indicator that the structure quality may be low

17 ALERT type 4 Improvement, methodology, query or suggestion

1 ALERT type 5 Informative message, check

---

---

It is advisable to attempt to resolve as many as possible of the alerts in all categories. Often the minor alerts point to easily fixed oversights, errors and omissions in your CIF or refinement strategy, so attention to these fine details can be worthwhile. In order to resolve some of the more serious problems it may be necessary to carry out additional measurements or structure refinements. However, the purpose of your study may justify the reported deviations and the more serious of these should normally be commented upon in the discussion or experimental section of a paper or in the "special\_details" fields of the CIF. checkCIF was carefully designed to identify outliers and unusual parameters, but every test has its limitations and alerts that are not important in a particular case may appear. Conversely, the absence of alerts does not guarantee there are no aspects of the results needing attention. It is up to the individual to critically assess their own results and, if necessary, seek expert advice.

### **Publication of your CIF in IUCr journals**

A basic structural check has been run on your CIF. These basic checks will be run on all CIFs submitted for publication in IUCr journals (*Acta Crystallographica*, *Journal of Applied Crystallography*, *Journal of Synchrotron Radiation*); however, if you intend to submit to *Acta Crystallographica Section C* or *E* or *IUCrData*, you should make sure that full publication checks are run on the final version of your CIF prior to submission.

### **Publication of your CIF in other journals**

Please refer to the *Notes for Authors* of the relevant journal for any special instructions relating to CIF submission.

---

**PLATON version of 16/04/2020; check.def file version of 09/03/2020**

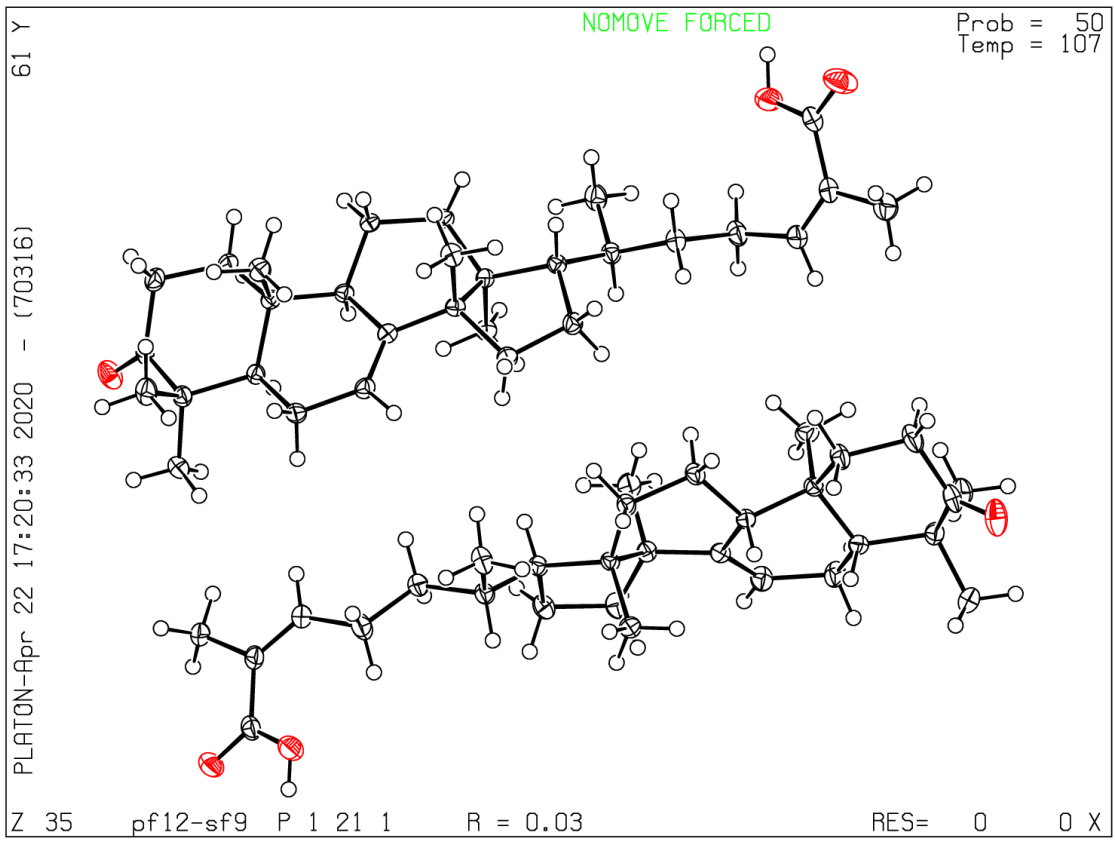

# checkCIF/PLATON report

Structure factors have been supplied for datablock(s) pf11-sf10

THIS REPORT IS FOR GUIDANCE ONLY. IF USED AS PART OF A REVIEW PROCEDURE FOR PUBLICATION, IT SHOULD NOT REPLACE THE EXPERTISE OF AN EXPERIENCED CRYSTALLOGRAPHIC REFEREE.

No syntax errors found.      CIF dictionary      Interpreting this report

## Datablock: pf11-sf10

---

Bond precision:    C-C = 0.0052 A                      Wavelength=1.54184

Cell:                      a=7.43165(12)              b=12.8741(2)              c=59.8281(12)  
                                    alpha=90                      beta=90                      gamma=90

Temperature:              102 K

|                | Calculated         | Reported           |
|----------------|--------------------|--------------------|
| Volume         | 5724.10(17)        | 5724.12(18)        |
| Space group    | P 21 21 21         | P 21 21 21         |
| Hall group     | P 2ac 2ab          | P 2ac 2ab          |
| Moiety formula | C30 H48 O3, C H4 O | C30 H48 O3, C H4 O |
| Sum formula    | C31 H52 O4         | C31 H52 O4         |
| Mr             | 488.73             | 488.72             |
| Dx,g cm-3      | 1.134              | 1.134              |
| Z              | 8                  | 8                  |
| Mu (mm-1)      | 0.564              | 0.564              |
| F000           | 2160.0             | 2160.0             |
| F000'          | 2165.83            |                    |
| h,k,lmax       | 8,15,72            | 8,15,71            |
| Nref           | 10450[ 5944]       | 10360              |
| Tmin,Tmax      | 0.804,0.978        | 0.543,1.000        |
| Tmin'          | 0.746              |                    |

Correction method= # Reported T Limits: Tmin=0.543 Tmax=1.000  
AbsCorr = GAUSSIAN

Data completeness= 1.74/0.99                      Theta(max)= 68.243

R(reflections)= 0.0503( 8100)                      wR2(reflections)= 0.1301( 10360)

S = 1.050                                              Npar= 654

---

The following ALERTS were generated. Each ALERT has the format  
**test-name\_ALERT\_alert-type\_alert-level.**  
Click on the hyperlinks for more details of the test.

---

● **Alert level C**

|                   |                                                 |         |           |
|-------------------|-------------------------------------------------|---------|-----------|
| PLAT031_ALERT_4_C | Refined Extinction Parameter Within Range ..... | 3.100   | Sigma     |
| PLAT340_ALERT_3_C | Low Bond Precision on C-C Bonds .....           | 0.00518 | Ang.      |
| PLAT417_ALERT_2_C | Short Inter D-H..H-D H28 ..H35 .                | 2.12    | Ang.      |
|                   | x,y,z =                                         | 1_555   | Check     |
| PLAT911_ALERT_3_C | Missing FCF Refl Between Thmin & STh/L=         | 0.600   | 14 Report |

---

● **Alert level G**

|                   |                                                               |       |        |
|-------------------|---------------------------------------------------------------|-------|--------|
| PLAT007_ALERT_5_G | Number of Unrefined Donor-H Atoms .....                       | 6     | Report |
| PLAT720_ALERT_4_G | Number of Unusual/Non-Standard Labels .....                   | 8     | Note   |
| PLAT790_ALERT_4_G | Centre of Gravity not Within Unit Cell: Resd. #<br>C30 H48 O3 | 2     | Note   |
| PLAT790_ALERT_4_G | Centre of Gravity not Within Unit Cell: Resd. #<br>C H4 O     | 4     | Note   |
| PLAT791_ALERT_4_G | Model has Chirality at C1 (Sohnke SpGr)                       | S     | Verify |
| PLAT791_ALERT_4_G | Model has Chirality at C1B (Sohnke SpGr)                      | S     | Verify |
| PLAT791_ALERT_4_G | Model has Chirality at C2 (Sohnke SpGr)                       | S     | Verify |
| PLAT791_ALERT_4_G | Model has Chirality at C2B (Sohnke SpGr)                      | S     | Verify |
| PLAT791_ALERT_4_G | Model has Chirality at C5 (Sohnke SpGr)                       | R     | Verify |
| PLAT791_ALERT_4_G | Model has Chirality at C5B (Sohnke SpGr)                      | R     | Verify |
| PLAT791_ALERT_4_G | Model has Chirality at C6 (Sohnke SpGr)                       | R     | Verify |
| PLAT791_ALERT_4_G | Model has Chirality at C6B (Sohnke SpGr)                      | R     | Verify |
| PLAT791_ALERT_4_G | Model has Chirality at C9 (Sohnke SpGr)                       | R     | Verify |
| PLAT791_ALERT_4_G | Model has Chirality at C9B (Sohnke SpGr)                      | R     | Verify |
| PLAT791_ALERT_4_G | Model has Chirality at C11 (Sohnke SpGr)                      | R     | Verify |
| PLAT791_ALERT_4_G | Model has Chirality at C11B (Sohnke SpGr)                     | R     | Verify |
| PLAT791_ALERT_4_G | Model has Chirality at C15 (Sohnke SpGr)                      | S     | Verify |
| PLAT791_ALERT_4_G | Model has Chirality at C15B (Sohnke SpGr)                     | S     | Verify |
| PLAT791_ALERT_4_G | Model has Chirality at C18 (Sohnke SpGr)                      | S     | Verify |
| PLAT791_ALERT_4_G | Model has Chirality at C18B (Sohnke SpGr)                     | S     | Verify |
| PLAT850_ALERT_4_G | Check Flack Parameter Exact Value 0.00 and s.u.               | 0.14  | Check  |
| PLAT910_ALERT_3_G | Missing # of FCF Reflection(s) Below Theta(Min).              | 2     | Note   |
| PLAT912_ALERT_4_G | Missing # of FCF Reflections Above STh/L=                     | 0.600 | 6 Note |
| PLAT933_ALERT_2_G | Number of OMIT Records in Embedded .res File ...              | 2     | Note   |
| PLAT978_ALERT_2_G | Number C-C Bonds with Positive Residual Density.              | 3     | Info   |

---

0 **ALERT level A** = Most likely a serious problem - resolve or explain  
0 **ALERT level B** = A potentially serious problem, consider carefully  
4 **ALERT level C** = Check. Ensure it is not caused by an omission or oversight  
25 **ALERT level G** = General information/check it is not something unexpected

0 ALERT type 1 CIF construction/syntax error, inconsistent or missing data  
3 ALERT type 2 Indicator that the structure model may be wrong or deficient  
3 ALERT type 3 Indicator that the structure quality may be low  
22 ALERT type 4 Improvement, methodology, query or suggestion  
1 ALERT type 5 Informative message, check

---

---

It is advisable to attempt to resolve as many as possible of the alerts in all categories. Often the minor alerts point to easily fixed oversights, errors and omissions in your CIF or refinement strategy, so attention to these fine details can be worthwhile. In order to resolve some of the more serious problems it may be necessary to carry out additional measurements or structure refinements. However, the purpose of your study may justify the reported deviations and the more serious of these should normally be commented upon in the discussion or experimental section of a paper or in the "special\_details" fields of the CIF. checkCIF was carefully designed to identify outliers and unusual parameters, but every test has its limitations and alerts that are not important in a particular case may appear. Conversely, the absence of alerts does not guarantee there are no aspects of the results needing attention. It is up to the individual to critically assess their own results and, if necessary, seek expert advice.

### **Publication of your CIF in IUCr journals**

A basic structural check has been run on your CIF. These basic checks will be run on all CIFs submitted for publication in IUCr journals (*Acta Crystallographica*, *Journal of Applied Crystallography*, *Journal of Synchrotron Radiation*); however, if you intend to submit to *Acta Crystallographica Section C* or *E* or *IUCrData*, you should make sure that full publication checks are run on the final version of your CIF prior to submission.

### **Publication of your CIF in other journals**

Please refer to the *Notes for Authors* of the relevant journal for any special instructions relating to CIF submission.

---

**PLATON version of 16/04/2020; check.def file version of 09/03/2020**

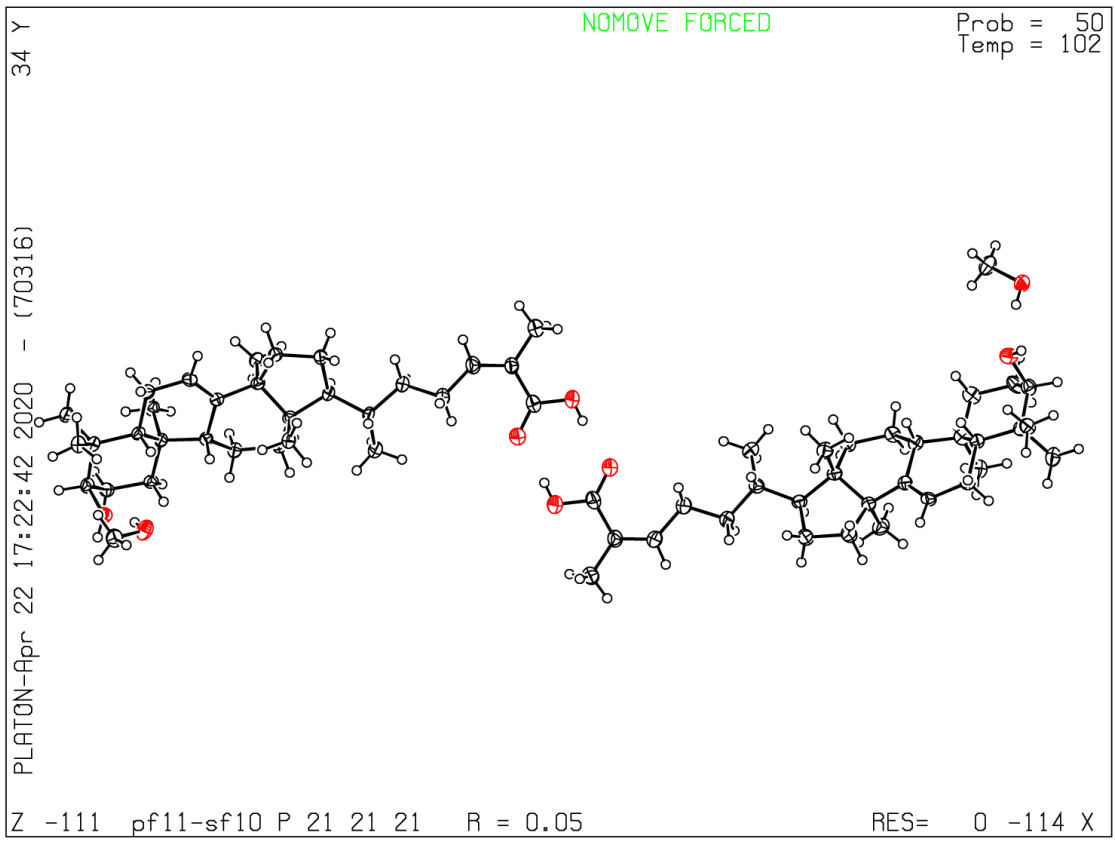

Supplement: 41598_2020_65080_MOESM1_ESM.pdf [file 41598_2020_65080_MOESM1_ESM.pdf]
